# Supplementary material
Source: PubMed Central journal article supplement (PMC9738023)
Supplement: 13012_2022_1250_MOESM2_ESM.pdf [file 13012_2022_1250_MOESM2_ESM.pdf]

## Additional File 2. Details of the training, resources and delivery of the MOHMQuit Intervention

Table A2.2 Details of the training, resources and delivery of the MOHMQuit Intervention

| Target group                                                                                                                                                                                                                              | Activities <sup>^</sup>                                                                                                                                                                                                                                                                                                                                                                                                                           | Resources                                                                                                                                                                                                                                                                                                                                                                                                                                                                                                                                            |
|-------------------------------------------------------------------------------------------------------------------------------------------------------------------------------------------------------------------------------------------|---------------------------------------------------------------------------------------------------------------------------------------------------------------------------------------------------------------------------------------------------------------------------------------------------------------------------------------------------------------------------------------------------------------------------------------------------|------------------------------------------------------------------------------------------------------------------------------------------------------------------------------------------------------------------------------------------------------------------------------------------------------------------------------------------------------------------------------------------------------------------------------------------------------------------------------------------------------------------------------------------------------|
| <b>Maternity service leaders, midwives, Aboriginal health workers, obstetricians and obstetric trainees</b>                                                                                                                               | <b>Two 30-minute online training modules from HETI<sup>^^</sup> covering:</b><br>(i) Harms of antenatal smoking<br>(ii) The evidence for SCS<br>(iii) Use of the 5As<br>(iv) Use of nicotine replacement therapy (NRT) in pregnancy<br><i>Note - it is intended that participants will have completed the HETI modules to ensure basic knowledge prior to MOHMQuit-specific training, which reinforces the learning presented in the modules.</i> | <i>Not applicable</i>                                                                                                                                                                                                                                                                                                                                                                                                                                                                                                                                |
| <b>Maternity service leadership group:</b> <ul style="list-style-type: none"> <li>• Midwifery unit managers</li> <li>• Clinical midwifery consultants</li> <li>• Clinical midwifery educators</li> <li>• Other senior midwives</li> </ul> | <b>3-hour workshop covering:</b> <ul style="list-style-type: none"> <li>• SCS leadership</li> <li>• Reviewing eMaternity* reports (local performance data on provision of SCS)</li> <li>• Action planning</li> <li>• Developing care pathways for SCS</li> <li>• Developing and maintaining champions</li> </ul>                                                                                                                                  | <ul style="list-style-type: none"> <li>• Template for generating eMaternity reports on provision of SCS in their clinic</li> <li>• Guidance on use of the eMaternity reports for quality improvement</li> <li>• Comparison with action for other conditions e.g., gestational diabetes</li> <li>• A clinic/service action planning tool</li> <li>• Guidance on developing champions</li> <li>• Guidance on developing local care pathways</li> <li>• Summary of evidence of effectiveness of 5As, Quitline and interventions in pregnancy</li> </ul> |

|                                                                                                                                                                                                                                                                                                                                                                    |                                                                                                                                                                                                                                                                                                                                                                                                                                                                 |                                                                                                                                                                                                                                                                                                                                                                                                                                                                                                                                                                                                                                                                           |
|--------------------------------------------------------------------------------------------------------------------------------------------------------------------------------------------------------------------------------------------------------------------------------------------------------------------------------------------------------------------|-----------------------------------------------------------------------------------------------------------------------------------------------------------------------------------------------------------------------------------------------------------------------------------------------------------------------------------------------------------------------------------------------------------------------------------------------------------------|---------------------------------------------------------------------------------------------------------------------------------------------------------------------------------------------------------------------------------------------------------------------------------------------------------------------------------------------------------------------------------------------------------------------------------------------------------------------------------------------------------------------------------------------------------------------------------------------------------------------------------------------------------------------------|
| <p><b>Clinical midwifery educators</b></p> <ul style="list-style-type: none"> <li>• In addition to attending the leadership workshop above, and attending the clinician training, educators at each site will attend an additional training to maximise sustainability of the intervention.</li> </ul>                                                             | <p><b>1-hour workshop covering:</b></p> <ul style="list-style-type: none"> <li>• How to provide MOHMQuit training to midwives, Aboriginal health workers and obstetricians.</li> </ul>                                                                                                                                                                                                                                                                          | <ul style="list-style-type: none"> <li>• A specific train-the-trainer resource pack that includes all the materials used in the training for midwives, Aboriginal health workers and obstetricians</li> <li>• Instruction on how to run training</li> <li>• Guidance on adapting the MOHMQuit training to different situations (e.g., one-on-one support, half-hour brief team training, or the full one-day workshop)</li> </ul>                                                                                                                                                                                                                                         |
| <p><b>Midwives and Aboriginal health workers:</b></p> <ul style="list-style-type: none"> <li>• All midwives providing antenatal care in any setting</li> <li>• All Aboriginal health workers providing antenatal care in any setting</li> </ul> <p><i>N.B. settings may include hospital or community-based clinics, outreach programs, and hospital wards</i></p> | <p><b>Full-day workshop covering:</b></p> <ul style="list-style-type: none"> <li>• Importance of providing SCS</li> <li>• How to provide effective SCS</li> <li>• How to use the MOHMQuit resources</li> <li>• Using tools for self-monitoring provision of SCS and action planning</li> <li>• Documentation of SCS in eMaternity to accurately record SCS provided in eMaternity, to enhance record keeping and communication with other clinicians</li> </ul> | <ul style="list-style-type: none"> <li>• 11 short videos demonstrating critical techniques in providing SCS</li> <li>• Guidance on recording smoking information in eMaternity</li> <li>• Information on NSW Quitline**</li> <li>• Comparison with action for other conditions e.g., gestational diabetes</li> <li>• Summary guide of the 5As</li> <li>• Assist and arrange follow-up flip booklet</li> <li>• Helpful hints for clinicians</li> <li>• Reference card to attach to ID card</li> <li>• Self-help booklet for use with women</li> <li>• NRT (nicotine replacement therapy) information sheets for clinicians</li> <li>• NRT information for women</li> </ul> |

|                                                                                                                                                                                                                                 |                                                                                                                                                                                                                                                                                                                                                                                                                                                                          |                                                                                                                                                                                                                                                                                                                                                                                                                                                                                                                                                                                                                                                                           |
|---------------------------------------------------------------------------------------------------------------------------------------------------------------------------------------------------------------------------------|--------------------------------------------------------------------------------------------------------------------------------------------------------------------------------------------------------------------------------------------------------------------------------------------------------------------------------------------------------------------------------------------------------------------------------------------------------------------------|---------------------------------------------------------------------------------------------------------------------------------------------------------------------------------------------------------------------------------------------------------------------------------------------------------------------------------------------------------------------------------------------------------------------------------------------------------------------------------------------------------------------------------------------------------------------------------------------------------------------------------------------------------------------------|
| <p><b>Obstetricians and obstetric trainees involved in antenatal care</b></p>                                                                                                                                                   | <p><b>2-hour training covering:</b></p> <ul style="list-style-type: none"> <li>• Importance of providing SCS</li> <li>• How to provide effective SCS</li> <li>• Use of the MOHMQuit resources</li> <li>• Documentation of SCS in eMaternity</li> </ul>                                                                                                                                                                                                                   | <ul style="list-style-type: none"> <li>• 11 short videos demonstrating critical techniques in providing SCS</li> <li>• Guidance on recording smoking information in eMaternity</li> <li>• Information on NSW Quitline**</li> <li>• Comparison with action for other conditions e.g., gestational diabetes</li> <li>• Summary guide of the 5As</li> <li>• Assist and arrange follow-up flip booklet</li> <li>• Helpful hints for clinicians</li> <li>• Reference card to attach to ID card</li> <li>• Self-help booklet for use with women</li> <li>• NRT (nicotine replacement therapy) information sheets for clinicians</li> <li>• NRT information for women</li> </ul> |
| <p><b>Maternity service leaders, midwives, Aboriginal health workers, obstetricians and obstetric trainees who have attended the MOHMQuit Training.</b><br/><i>Attendees will be invited to attend at their discretion.</i></p> | <p><b>Community of Practice meetings (1-hour meetings, held online)</b></p> <ul style="list-style-type: none"> <li>• Five weeks after training occurs at their site, each site will be encouraged to participate in Community of practice meetings, facilitated online by the research team.</li> <li>• Meetings will continue monthly and provide additional and ongoing support to all leaders and clinicians and encourage peer support and encouragement.</li> </ul> | <p><i>Not applicable</i></p>                                                                                                                                                                                                                                                                                                                                                                                                                                                                                                                                                                                                                                              |

^While it is intended to run both the leader and clinician workshops in a face-to-face format, remote options (video-conferencing etc) will be used if required because of COVID-19 restrictions. Remote options will also be used to supplement or reinforce the face-to-face training, as required, including the Community of Practice meetings.

^^HETI (The NSW Health Education and Training Institute) provides training and education to support clinicians, trainers, managers and leaders across the NSW health system. The Institute has developed two 30-minute online training modules on supporting pregnant women to quit smoking.

\*eMaternity is the electronic health record used by maternity services in New South Wales.

\*\*NSW Quitline is confidential telephone information and advice service to help smokers quit smoking and remain abstinent.
