# Supplementary material
Source: PubMed Central journal article supplement (PMC9738023)
Supplement: 13012_2022_1250_MOESM3_ESM.pdf [file 13012_2022_1250_MOESM3_ESM.pdf]

## Additional File 3. Completed Consolidated Standards of Reporting Trials (CONSORT) extension for the stepped wedge cluster randomised trial

Table A3. CONSORT 2010 checklist of information to include when reporting a cluster randomised trial.(1)

| Section/Topic             | Item No | Checklist item                                                                                                                                                                                                                                                                                                       | Section of the paper                                                                                                                                                                                                                                                                                                               |
|---------------------------|---------|----------------------------------------------------------------------------------------------------------------------------------------------------------------------------------------------------------------------------------------------------------------------------------------------------------------------|------------------------------------------------------------------------------------------------------------------------------------------------------------------------------------------------------------------------------------------------------------------------------------------------------------------------------------|
|                           | 1a      | Identification as a cluster randomised trial in the title.                                                                                                                                                                                                                                                           | Title page                                                                                                                                                                                                                                                                                                                         |
|                           | 1b      | Structured summary of trial design, methods, results, and conclusions (see separate SW-CRT checklist for abstracts).                                                                                                                                                                                                 | Abstract (partly applicable only – protocol). Abstract includes Background, Methods, Discussion and Trial registration.                                                                                                                                                                                                            |
| Background and objectives | 2a      | Scientific background. Rationale for using a cluster design.                                                                                                                                                                                                                                                         | Methods, study design                                                                                                                                                                                                                                                                                                              |
|                           | 2b      | Specific objectives or hypotheses.                                                                                                                                                                                                                                                                                   | <ul style="list-style-type: none"> <li>- Primary hypothesis: Methods</li> <li>- Aims: Study design</li> <li>- Outcomes: Methods, Data collection and analysis, Primary outcome (health outcome) and Table 2 details the secondary health outcome, intervention outcomes, moderators, mediators and economic evaluation.</li> </ul> |
| Trial design              | 3a      | Description and diagram of trial design including definition of cluster, number of sequences, number of clusters randomised to each sequence, number of periods, duration of time between each step, and whether the participants assessed in different periods are the same people, different people, or a mixture. | <ul style="list-style-type: none"> <li>- Description and diagram of trial design with all details: Methods, Study design.</li> <li>- Note: Figure 2 in the Methods illustrates the Implementation of MOHMQuit and the stepped-wedge cluster-randomised trial design.</li> </ul>                                                    |
|                           | 3b      | Important changes to methods after trial commencement (such as eligibility criteria), with reasons.                                                                                                                                                                                                                  | Not applicable (protocol paper)                                                                                                                                                                                                                                                                                                    |
| Participants              | 4a      | Eligibility criteria for clusters and participants.                                                                                                                                                                                                                                                                  | <ul style="list-style-type: none"> <li>- Eligibility for clusters (sites): Methods, Participants, eligibility – study sites</li> <li>- Eligibility for participants (maternity service leaders and clinicians): Methods, Participants, eligibility – maternity service leaders and clinicians</li> </ul>                           |

|                     |    |                                                                                                                                                                                                                                                                                               |                                                                                                                                                                                                                                                                                                                                                                                               |
|---------------------|----|-----------------------------------------------------------------------------------------------------------------------------------------------------------------------------------------------------------------------------------------------------------------------------------------------|-----------------------------------------------------------------------------------------------------------------------------------------------------------------------------------------------------------------------------------------------------------------------------------------------------------------------------------------------------------------------------------------------|
|                     |    |                                                                                                                                                                                                                                                                                               | - Eligibility for participants (pregnant and postpartum women):<br>Methods, Participants, eligibility – pregnant and postpartum women                                                                                                                                                                                                                                                         |
|                     | 4b | Settings and locations where the data were collected.                                                                                                                                                                                                                                         | Methods, Settings                                                                                                                                                                                                                                                                                                                                                                             |
| Interventions       | 5  | The intervention and control conditions with sufficient details to allow replication, including whether the intervention was maintained or repeated, and whether it was delivered at the cluster level, the individual participant level, or both.                                            | - Methods, The implementation intervention - MOHMQuit<br>- Methods, Study design                                                                                                                                                                                                                                                                                                              |
| Outcomes            | 6a | Completely defined pre-specified primary and secondary outcome measures, including how and when they were assessed.                                                                                                                                                                           | - Methods, Primary hypothesis<br>- Outcomes: Methods, Data collection and analysis, Primary outcome (health outcome) and Table 2 details the secondary health outcome, intervention outcomes, moderators, mediators and economic evaluation<br>- Note: Table 2 and Figure 3 also provide information on primary and secondary outcome measures, sources of data and timepoints of collection. |
|                     | 6b | Any changes to trial outcomes after the trial commenced, with reasons.                                                                                                                                                                                                                        | Not applicable (protocol paper)                                                                                                                                                                                                                                                                                                                                                               |
| Sample size         | 7a | How sample size was determined. Method of calculation and relevant parameters with sufficient detail so the calculation can be replicated. Assumptions made about correlations between outcomes of participants from the same cluster. (See separate checklist for SW-CRT sample size items). | Methods, Sample size                                                                                                                                                                                                                                                                                                                                                                          |
|                     | 7b | When applicable, explanation of any interim analyses and stopping guidelines.                                                                                                                                                                                                                 | Not applicable (protocol paper)                                                                                                                                                                                                                                                                                                                                                               |
| Sequence generation | 8a | Method used to generate the random allocation sequence.                                                                                                                                                                                                                                       | Methods, Randomisation and blinding                                                                                                                                                                                                                                                                                                                                                           |
|                     | 8b | Type of randomisation; details of any constrained randomisation or stratification, if used.                                                                                                                                                                                                   | Not applicable (protocol paper)                                                                                                                                                                                                                                                                                                                                                               |

Additional File 3 for the paper: *The MOHMQuit (Midwives and Obstetricians Helping Mothers to Quit Smoking) Trial: protocol for a stepped-wedge implementation trial to improve best practice smoking cessation support in public antenatal care services.*

|                                                      |     |                                                                                                                                                                                                                                                                                           |                                                                                                                                                                                                                                                                              |
|------------------------------------------------------|-----|-------------------------------------------------------------------------------------------------------------------------------------------------------------------------------------------------------------------------------------------------------------------------------------------|------------------------------------------------------------------------------------------------------------------------------------------------------------------------------------------------------------------------------------------------------------------------------|
| Allocation concealment mechanism                     | 9   | Specification that allocation was based on clusters; description of any methods used to conceal the allocation from the clusters until after recruitment.                                                                                                                                 | Methods, Randomisation and blinding                                                                                                                                                                                                                                          |
| Implementation                                       | 10a | Who generated the randomisation schedule, who enrolled clusters, and who assigned clusters to sequences.                                                                                                                                                                                  | - Randomisation schedule: Methods, Randomisation and blinding<br>- Enrolment of clusters/services: Methods, Recruitment and consent – Services; and Methods, Eligibility criteria – Study sites<br>- Who assigned clusters to sequences: Methods, Randomisation and blinding |
|                                                      | 10b | Mechanism by which individual participants were included in clusters for the purposes of the trial (such as complete enumeration, random sampling; continuous recruitment or ascertainment; or recruitment at a fixed point in time), including who recruited or identified participants. | - Methods, Recruitment and consent, Staff (maternity service leaders and clinicians)<br>- Methods, Recruitment and consent, Pregnant and postpartum women                                                                                                                    |
|                                                      | 10c | Whether, from whom and when consent was sought and for what; whether this differed between treatment conditions.                                                                                                                                                                          | - Methods, Recruitment and consent, Staff (maternity service leaders and clinicians)<br>- Methods, Recruitment and consent, Pregnant and postpartum women                                                                                                                    |
| Blinding                                             | 11a | If done, who was blinded after assignment to sequences (e.g., cluster level participants, individual level participants, those assessing outcomes) and how.                                                                                                                               | Methods, Randomisation and blinding                                                                                                                                                                                                                                          |
|                                                      | 11b | If relevant, description of the similarity of interventions.                                                                                                                                                                                                                              | Not relevant                                                                                                                                                                                                                                                                 |
| Statistical methods                                  | 12a | Statistical methods used to compare treatment conditions for primary and secondary outcomes including how time effects, clustering and repeated measures were taken into account.                                                                                                         | Clustering and repeated measures:<br>- Methods, Data collection and analysis, Primary outcome (health outcome)<br>- Methods, Data collection and analysis, Table 2                                                                                                           |
|                                                      | 12b | Methods for additional analyses, such as subgroup analyses, sensitivity analyses, and adjusted analyses.                                                                                                                                                                                  | Sensitivity analyses:<br>- Methods, Data collection and analysis, Table 2                                                                                                                                                                                                    |
| Participant flow (a diagram is strongly recommended) | 13a | For each treatment condition or allocated sequence, the numbers of clusters and participants who were assessed for eligibility, were randomly assigned, received intended treatments, and were                                                                                            | Not applicable (protocol paper)                                                                                                                                                                                                                                              |

|                         |     |                                                                                                                                                                                                                                                |                                 |
|-------------------------|-----|------------------------------------------------------------------------------------------------------------------------------------------------------------------------------------------------------------------------------------------------|---------------------------------|
|                         |     | analysed for the primary outcome (see separate SW-CRT flow chart).                                                                                                                                                                             |                                 |
|                         | 13b | For each treatment condition or allocated sequence, losses and exclusions for both clusters and participants with reasons.                                                                                                                     | Not applicable (protocol paper) |
| Recruitment             | 14a | Dates defining the steps, initiation of intervention, and deviations from planned dates. Dates defining recruitment and follow-up for participants.                                                                                            | Not applicable (protocol paper) |
|                         | 14b | Why the trial ended or was stopped.                                                                                                                                                                                                            | Not applicable (protocol paper) |
| Baseline data           | 15  | Baseline characteristics for the individual and cluster levels as applicable for each treatment condition or allocated sequence.                                                                                                               | Not applicable (protocol paper) |
| Numbers analysed        | 16  | The number of observations and clusters included in each analysis for each treatment condition and whether the analysis was according to the allocated schedule.                                                                               | Not applicable (protocol paper) |
| Outcomes and estimation | 17a | For each primary and secondary outcome, results for each treatment condition, and the estimated effect size and its precision (such as 95% confidence interval); any correlations (or covariances) and time effects estimated in the analysis. | Not applicable (protocol paper) |
|                         | 17b | For binary outcomes, presentation of both absolute and relative effect sizes is recommended.                                                                                                                                                   | Not applicable (protocol paper) |
| Ancillary analyses      | 18  | Results of any other analyses performed, including subgroup analyses and adjusted analyses, distinguishing pre-specified from exploratory.                                                                                                     | Not applicable (protocol paper) |
| Harms                   | 19  | All important harms or unintended effects in each group (for specific guidance see CONSORT for harms).                                                                                                                                         | Not applicable (protocol paper) |
| Limitations             | 20  | Trial limitations, addressing sources of potential bias, imprecision, and, if relevant, multiplicity of analyses.                                                                                                                              | Not applicable (protocol paper) |
| Generalisability        | 21  | Generalisability (external validity, applicability) of the trial findings. Generalisability to clusters and/or individual participants (as relevant).                                                                                          | Not applicable (protocol paper) |
| Interpretation          | 22  | Interpretation consistent with results, balancing benefits and harms, and considering other relevant evidence.                                                                                                                                 | Not applicable (protocol paper) |

|                        |    |                                                                                                                                                                                               |                                                          |
|------------------------|----|-----------------------------------------------------------------------------------------------------------------------------------------------------------------------------------------------|----------------------------------------------------------|
| Registration           | 23 | Registration number and name of trial registry.                                                                                                                                               | Abstract                                                 |
| Protocol               | 24 | Where the full trial protocol can be accessed, if available.                                                                                                                                  | Not applicable (protocol paper)                          |
| Funding                | 25 | Sources of funding and other support (such as supply of drugs), and the role of funders.                                                                                                      | Declarations, Funding                                    |
| Research ethics review | 26 | Whether the study was approved by a research ethics committee, with identification of the review committee(s). Justification for any waiver or modification of informed consent requirements. | Declarations, Ethics approval and consent to participate |

### Reference for Additional File 3

1. Hemming K, Taljaard M, McKenzie JE, Hooper R, Copas A, Thompson JA, et al. Reporting of stepped wedge cluster randomised trials: extension of the CONSORT 2010 statement with explanation and elaboration. *BMJ*. 2018;363.
